# Supplementary material for: Targeting of the class II transactivator attenuates inflammation and neurodegeneration in an alpha-synuclein model of Parkinson’s disease
Source: PubMed Central journal article supplement (PMC6117927; doi:10.1186/s12974-018-1286-2), 2018-08-30

**A**

LVA: AAGTG TACAAGGTAGCTGG

LVC: TGTCTTTGATTTTCATTGCA

LVD: TATTGTACAAGCTCAGCCT

LVE: TGTATCACTCAAGGAGGCC

LVF: TTGTSTCACTCAAGGAGGC

 $3 \times 10^8$  IFU/mL**B**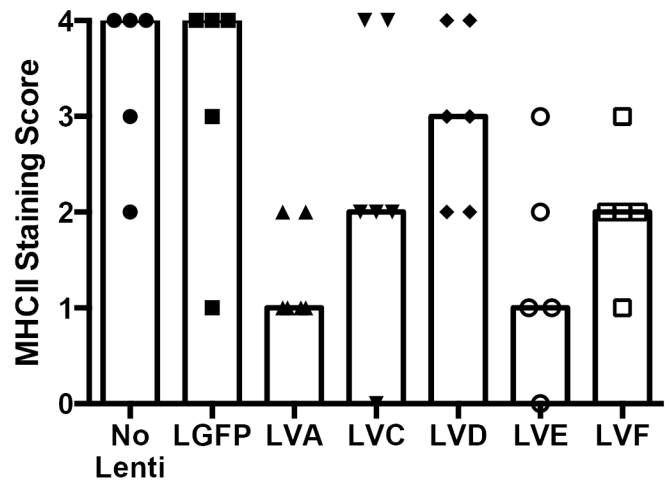**C**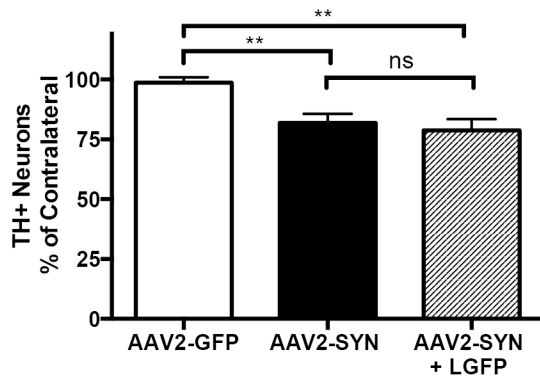**D**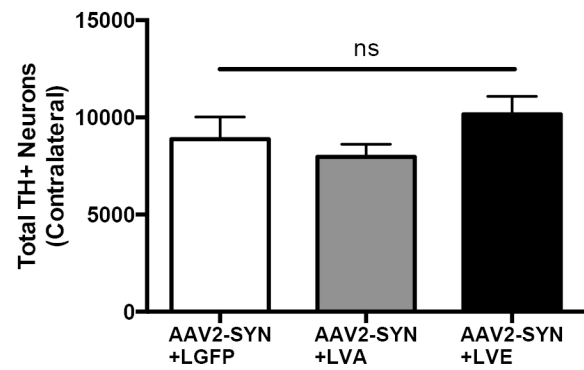

Supplement: 12974_2018_1286_MOESM1_ESM.pdf [file 12974_2018_1286_MOESM1_ESM.pdf]
