# Supplementary material for: Targeting of the class II transactivator attenuates inflammation and neurodegeneration in an alpha-synuclein model of Parkinson’s disease
Source: PubMed Central journal article supplement (PMC6117927; doi:10.1186/s12974-018-1286-2), 2018-08-30

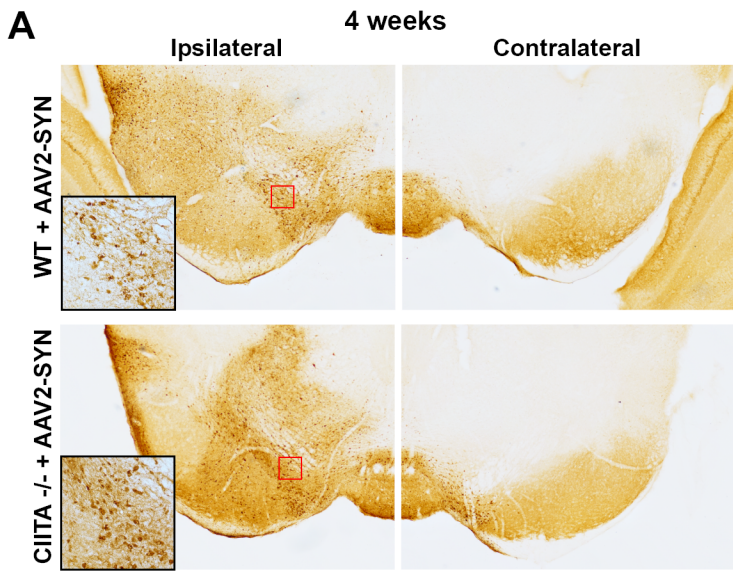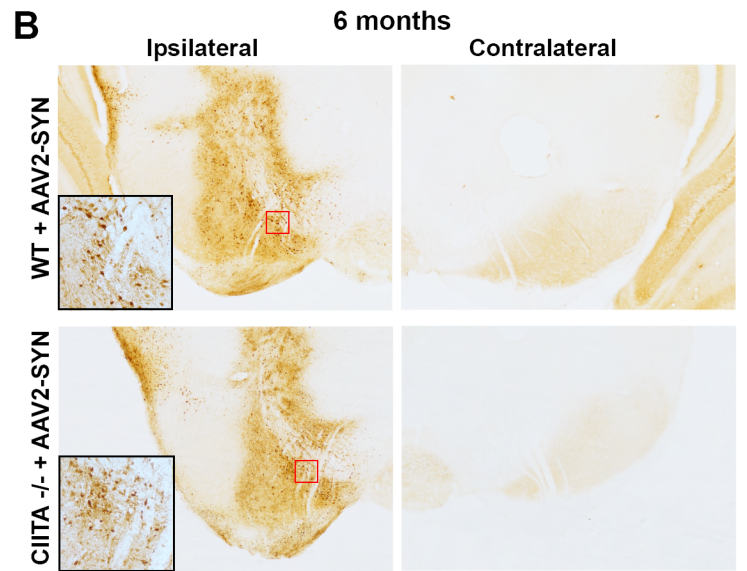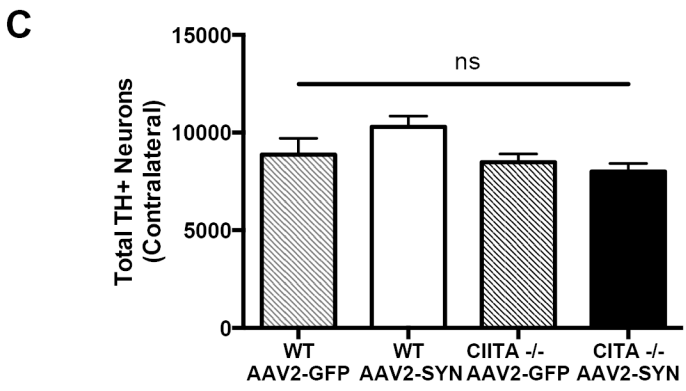

Supplement: 12974_2018_1286_MOESM2_ESM.pdf [file 12974_2018_1286_MOESM2_ESM.pdf]
