# Supplementary material for: Targeting of the class II transactivator attenuates inflammation and neurodegeneration in an alpha-synuclein model of Parkinson’s disease
Source: Springer Nature journal article supplement (doi:10.1186/s12974-018-1286-2), 2018-08-30

**A**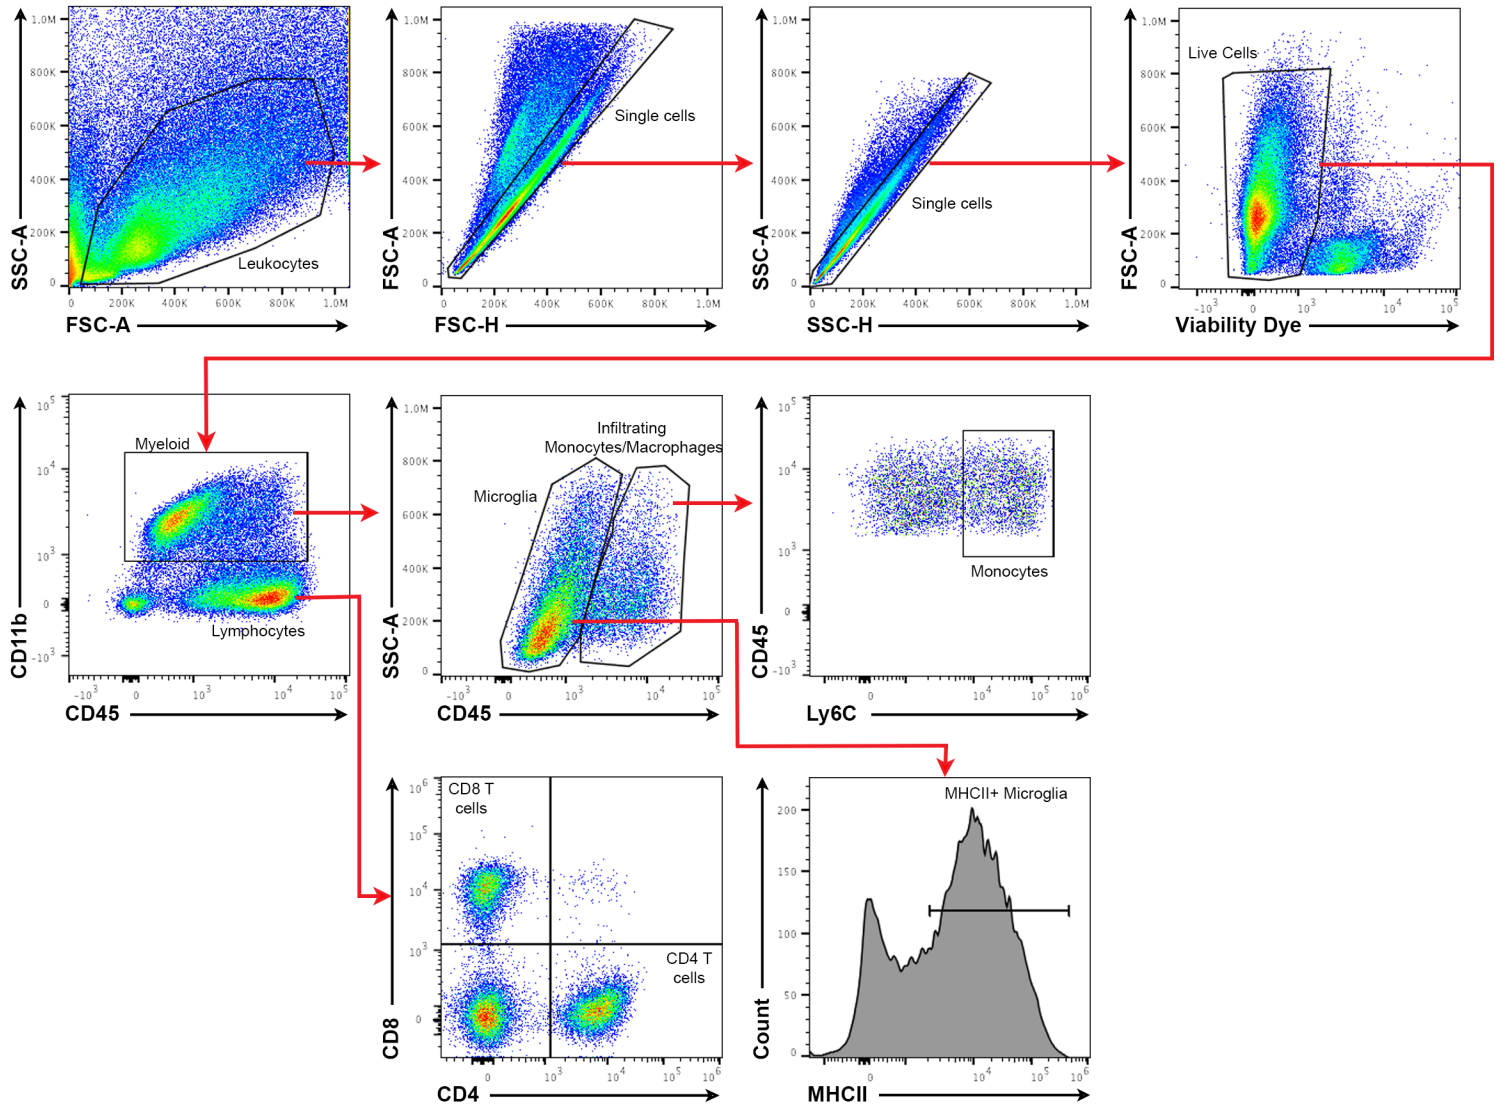

Supplement: MOESM3 [file 16086310]
